# Supplementary material for: Numerical simulations and observations of the role of katabatic winds in the creation and maintenance of Scharffenbergbotnen blue ice area, Antarctica
Source: Copernicus journal article supplement (doi:10.5194/tc-9-1415-2015), 2015-08-04
Supplement: Supplementary file 1 [file tc-9-1415-2015-supplement.zip]

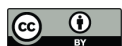

## *Supplement of*

# **Numerical simulations and observations of the role of katabatic winds in the creation and maintenance of Scharffenbergbotnen blue ice area, Antarctica**

**T. Zwinger et al.**

*Correspondence to:* J. C. Moore ([john.moore.bnu@gmail.com](mailto:john.moore.bnu@gmail.com))

- [tc-9-1415-2015-supplement-title-page.pdf](#)
- [README\\_animations.txt](#)
- [noseL\\_present.gif](#)
- [nose\\_LGM.gif](#)
- [nose\\_present.gif](#)
- [nose\\_present\\_smooth.gif](#)
- [parabola\\_present.gif](#)

The copyright of individual parts of the supplement might differ from the CC-BY 3.0 licence.
